# Supplementary material
Source: publisher figshare collection journal article supplement (https://acs.figshare.com/ndownloader/files/6003078)
Supplement: Supplementary file 1 [file 6003078]

## Detection and Live-Cell Imaging of a Micro-RNA

### Associated with the Cancer Neuroblastoma

Eoin Brennan, Roisin Moriarty, Tia E Keyes and Robert J. Forster\*

School of Chemical Sciences,

Dublin City University,

Dublin 9, Ireland

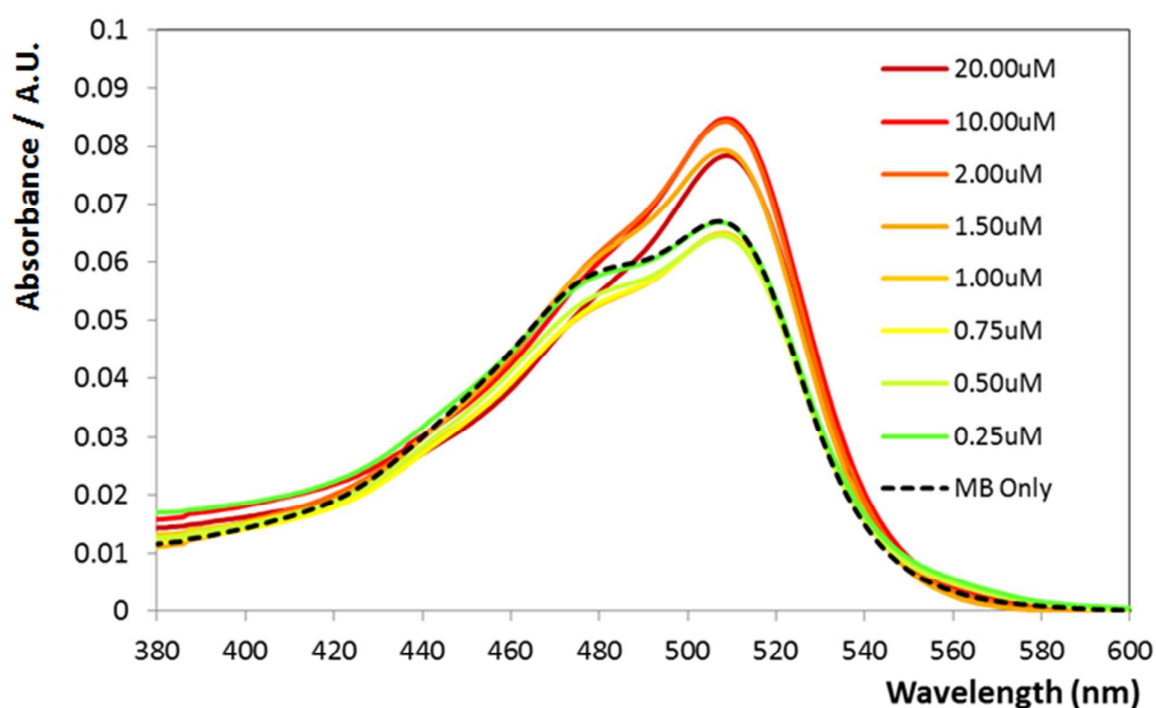

Figure S1: Absorption spectra of 1 μM molecular beacon in PBS in the absence of target (---), and 1 μM molecular beacon in PBS with varying concentration of miRNA-132 between 0.25 μM and 20 μM, after a hybridisation time of 10 minutes.

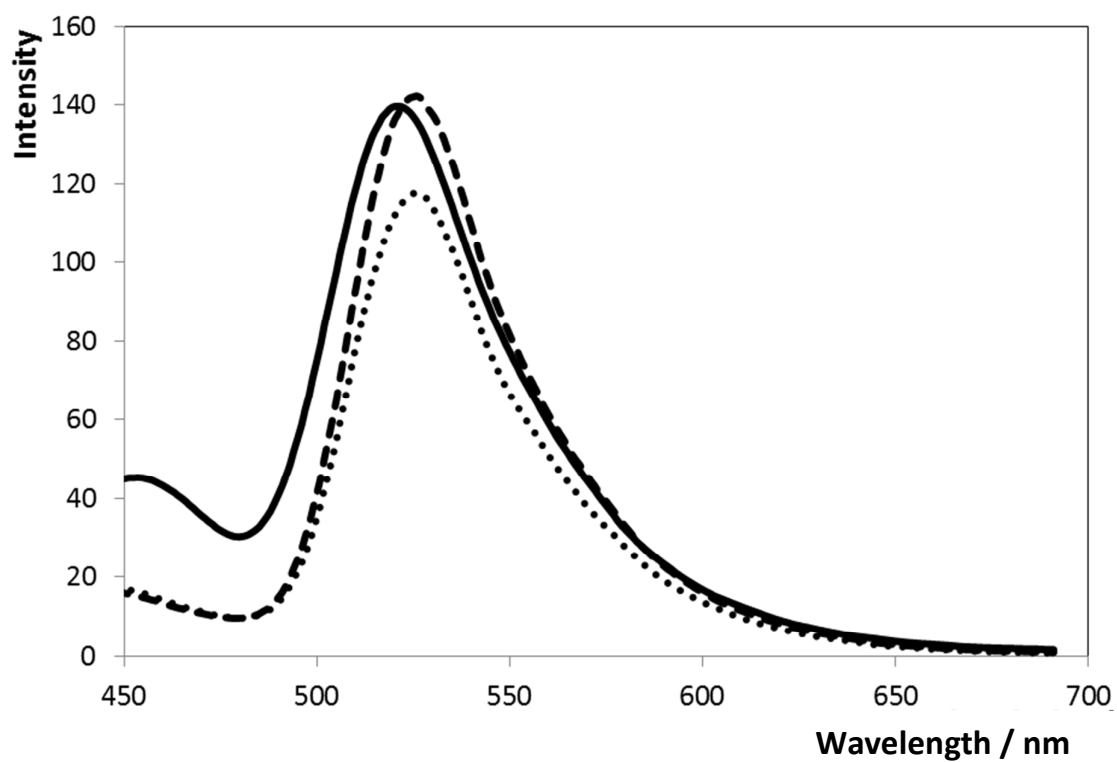

Figure S2: Emission spectra of 1  $\mu$ M molecular beacon in PBS in the absence of target (—), and 1  $\mu$ M molecular beacon in PBS with 1  $\mu$ M 1 Base mismatch (···) and 1  $\mu$ M 2 Base mismatch (- - -), after a hybridisation time of 10 minutes.

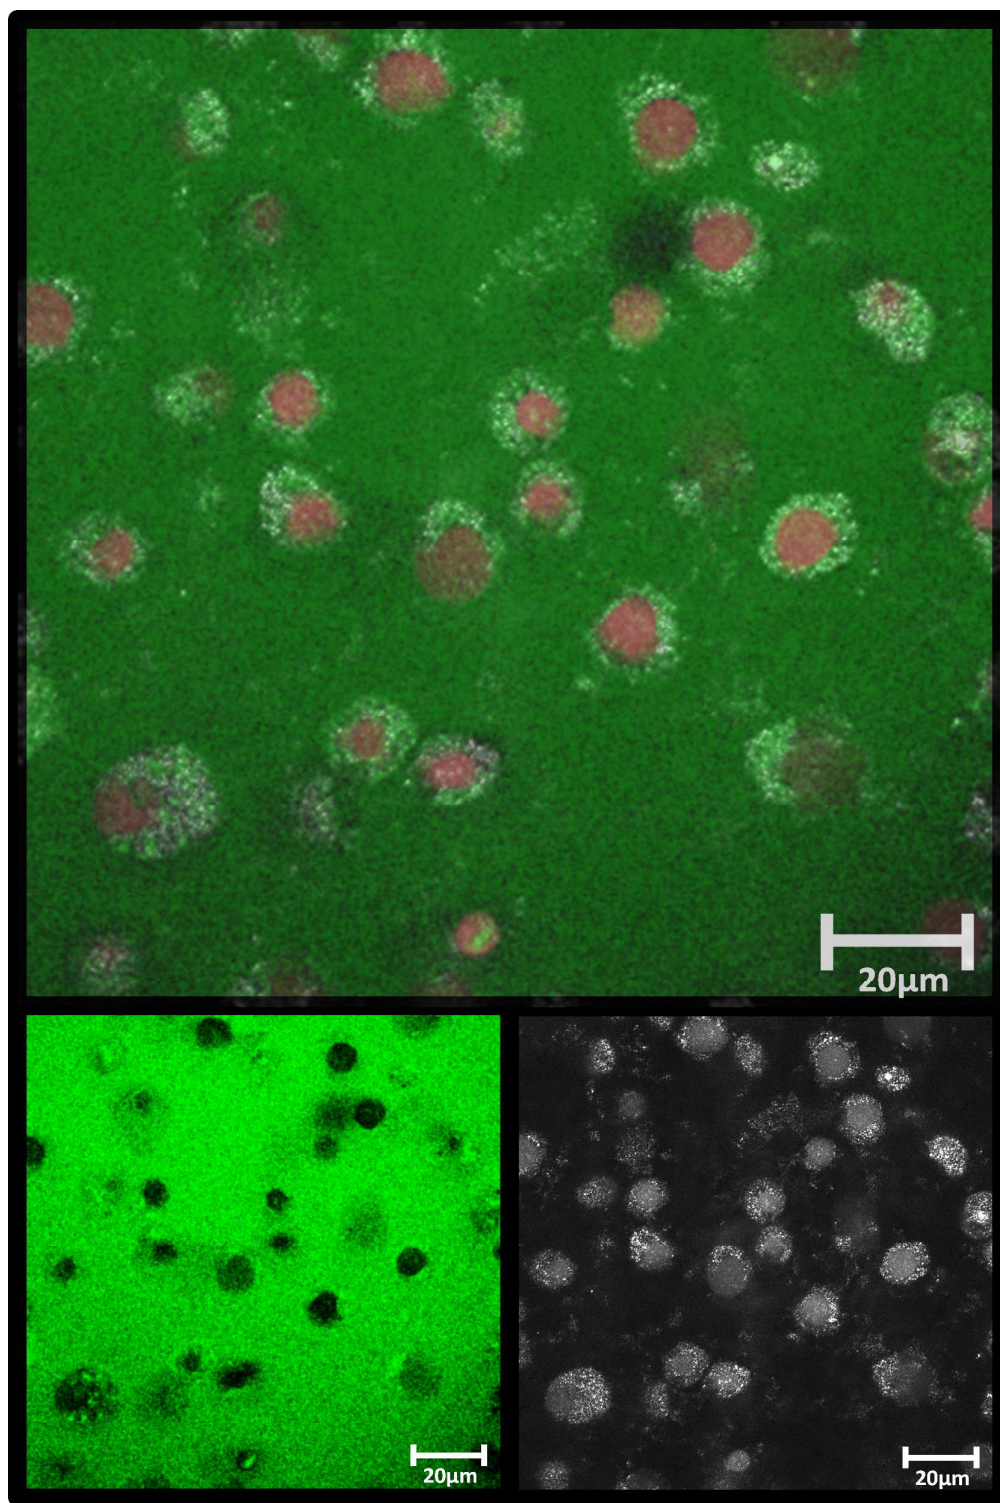

*Figure S3: Confocal image of floating SK-N-AS cells 24 hours after electroporation with 50  $\mu$ M 6-FAM (Green) in PBS and with 1  $\mu$ M DRAQ7 (Red) viability dye. Excitation with argon ion laser at 458nm and with an LP560 filter at 6%.*
